# Supplementary material for: Formation of MnO 2 -coated ITO electrodes with high catalytic activity for enzymatic glucose detection
Source: Royal Society of Chemistry journal article supplement (doi:10.1039/d3dt02199h), 2023-01-01
Supplement: d3dt02199h1.pdf [file d3dt02199h1.pdf]

## Formation of MnO<sub>2</sub>-coated ITO electrodes with high catalytic activity for enzymatic glucose detection

Veronika Poltavets\*<sup>a</sup> (vpoltavets@ichf.edu.pl), Mirosław Krawczyk<sup>a</sup> (mkrawczyk@ichf.edu.pl), Ganna Maslak<sup>b</sup> (205\_01@dmu.edu.ua), Olga Abraimova<sup>b</sup> (205\_04@dmu.edu.ua), Martin Jönsson-Niedziółka\*<sup>a</sup> (martinj@ichf.edu.pl)

### Supplementary information

#### XPS data

pH1\_CV\_60

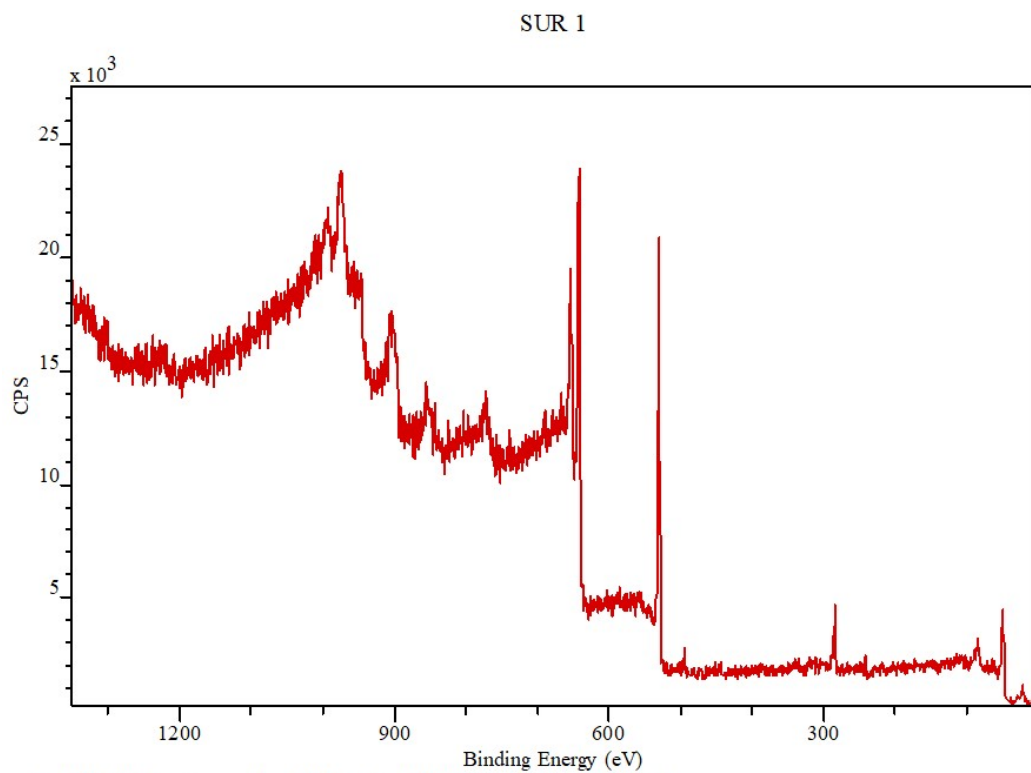

CasaXPS (This string can be edited in CasaXPS.DEF/PrintFootNote.txt)

### Mn2p 2

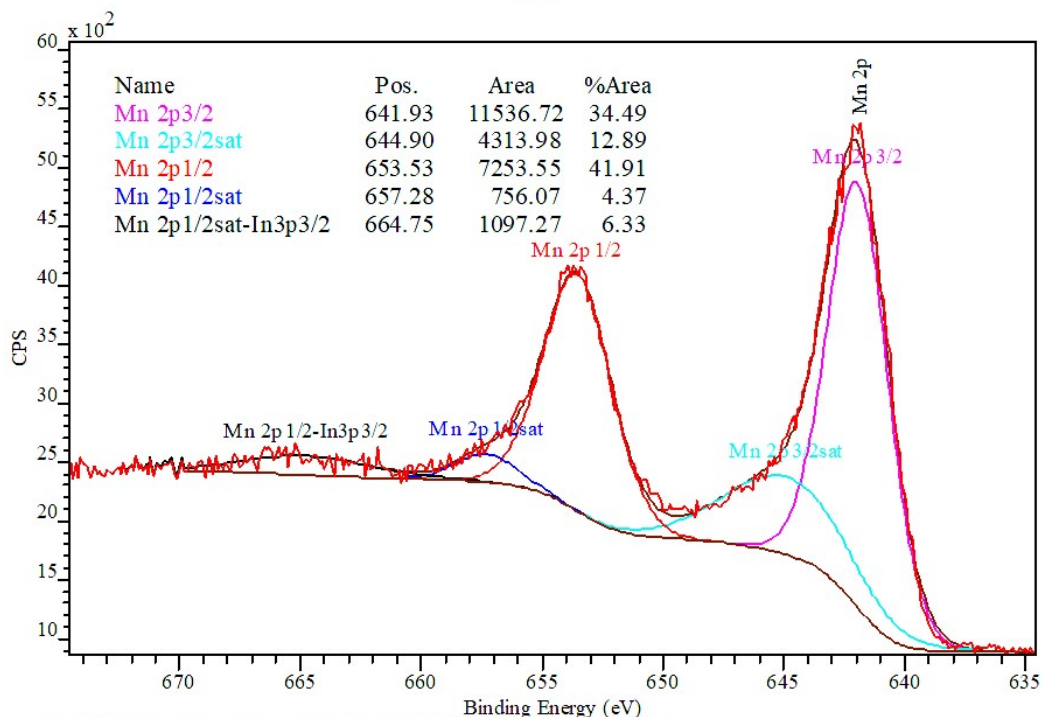

CasaXPS (This string can be edited in CasaXPS.D EF/PrintFootNote.txt)

### Mn3s 12

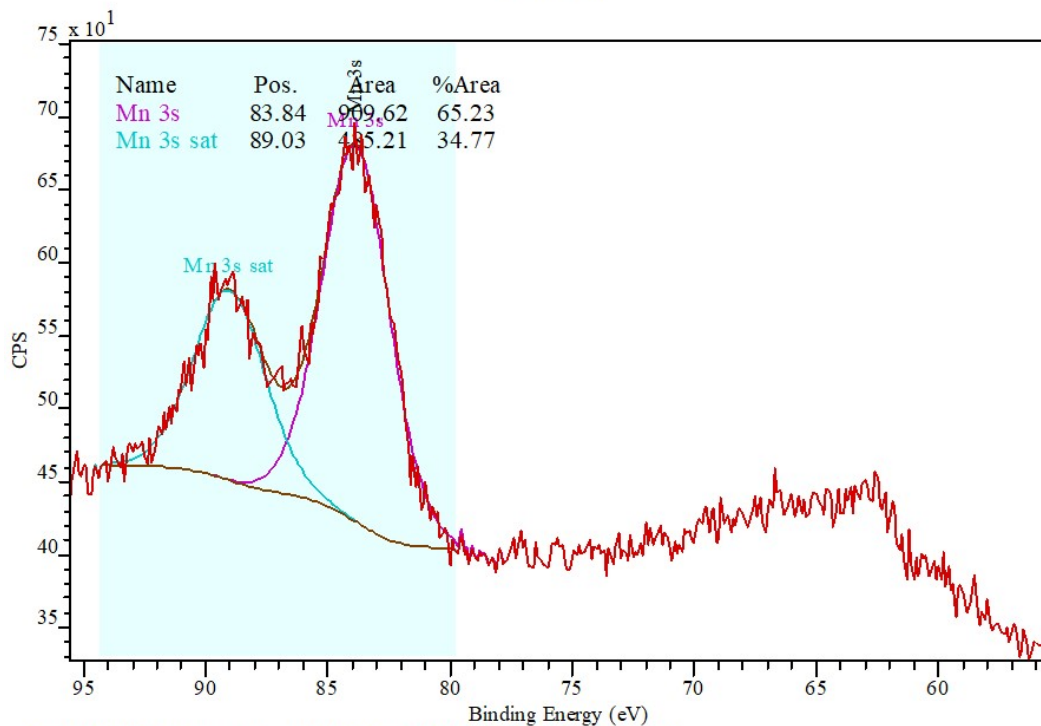

CasaXPS (This string can be edited in CasaXPS.D EF/PrintFootNote.txt)

O1s 3

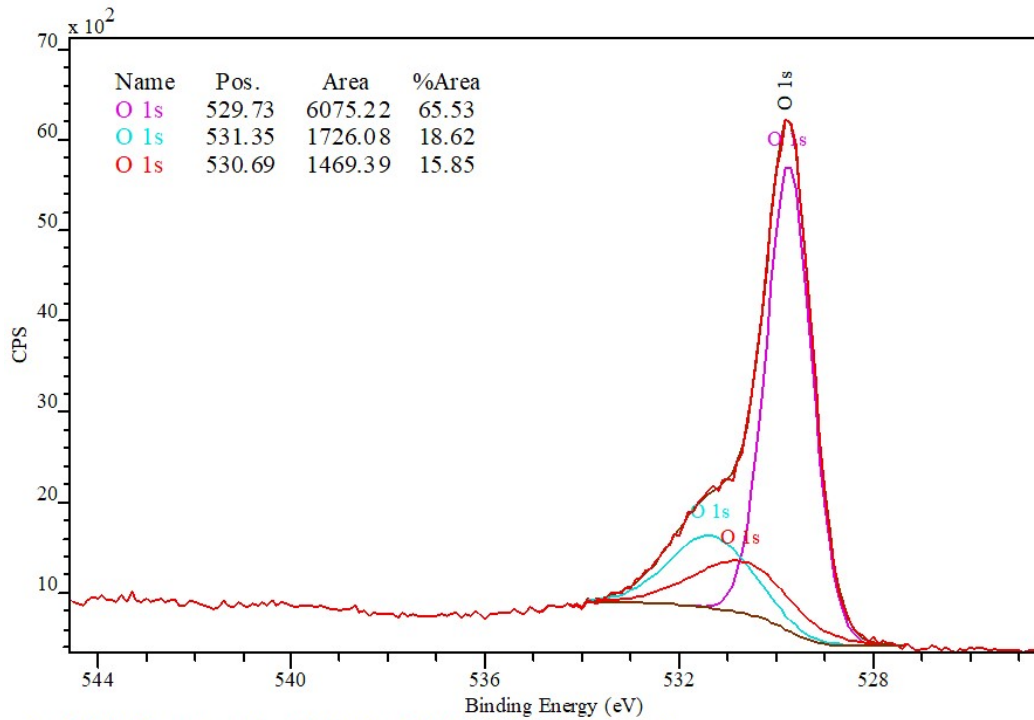

CasaXPS (This string can be edited in CasaXPS.DEF/PrintFoot Note.txt)

Sn3d 4

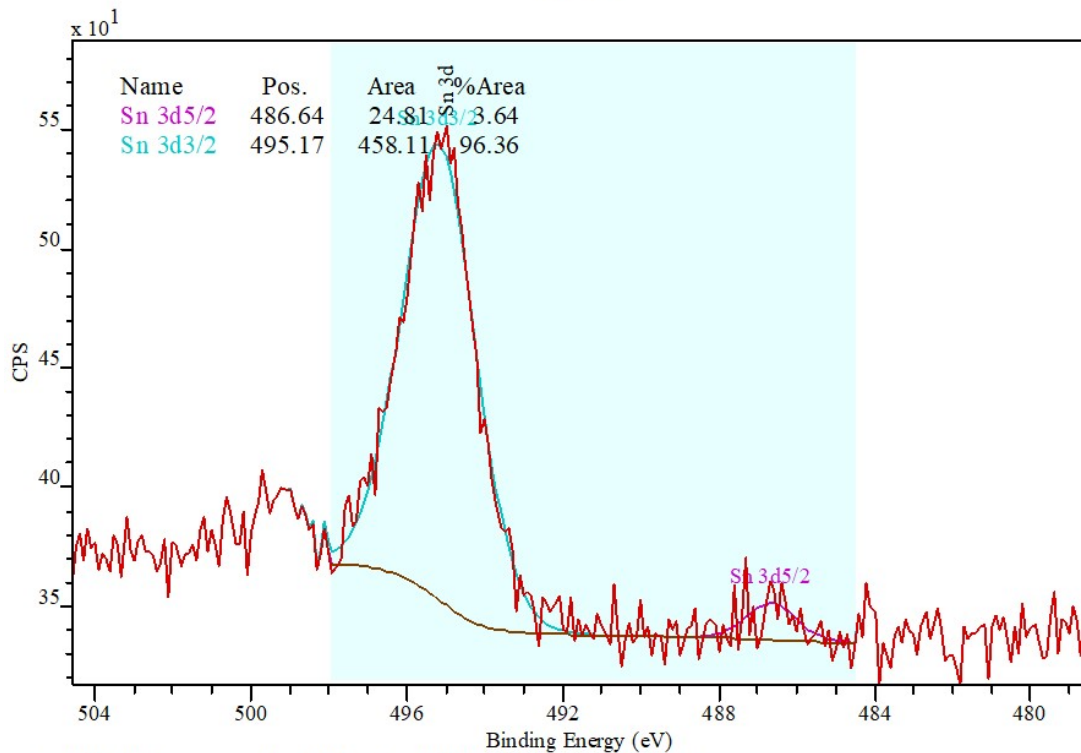

CasaXPS (This string can be edited in CasaXPS.DEF/PrintFoot Note.txt)

### In3d 5

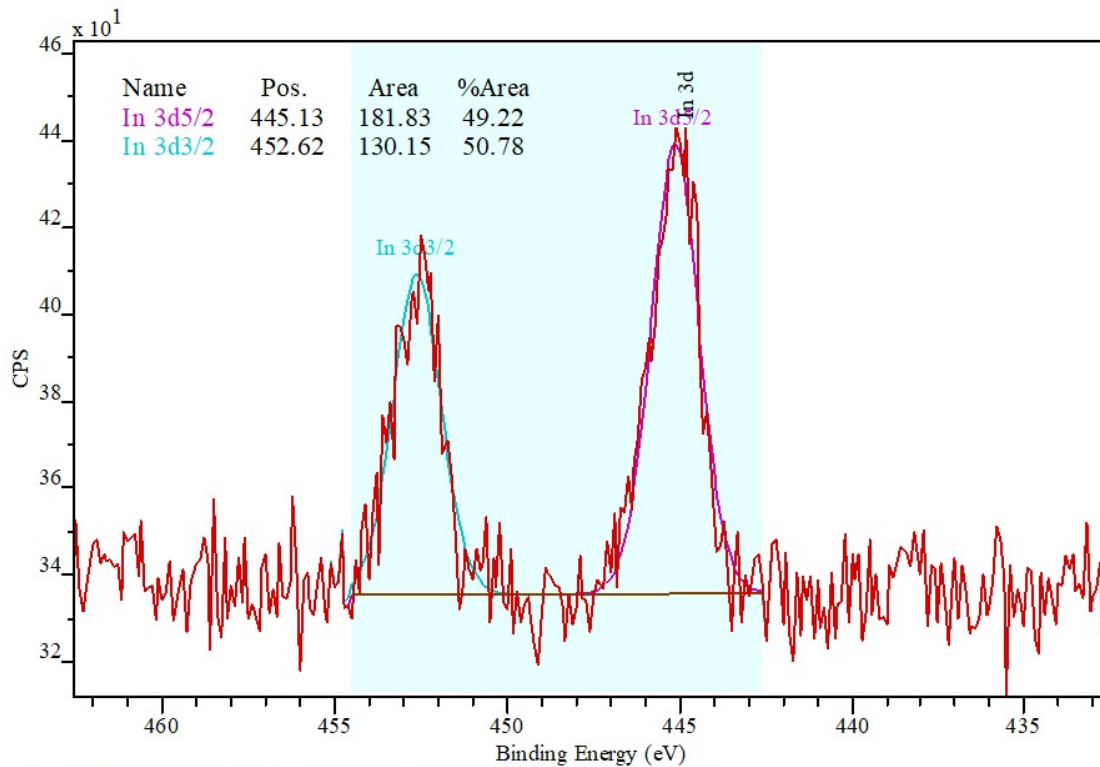

CasaXPS (This string can be edited in CasaXPS.D\EF\PrintFootNote.txt)

### pH1\_CV\_90

#### SUR 1

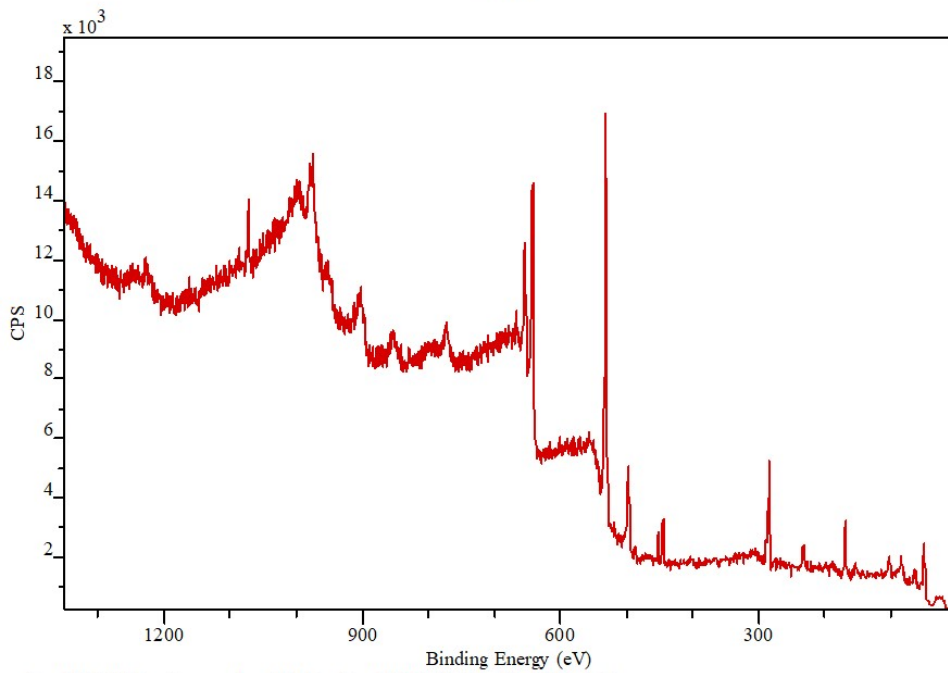

CasaXPS (This string can be edited in CasaXPS.D\EF\PrintFootNote.txt)

### Mn2p 2

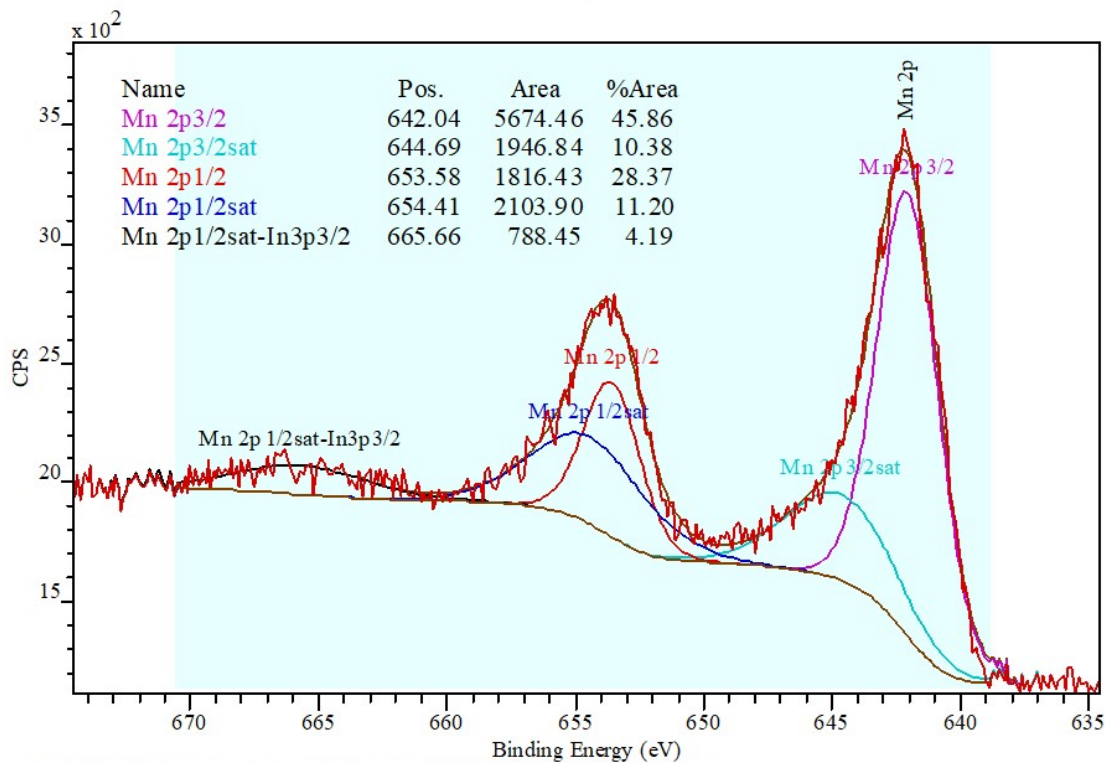

CasaXPS (This string can be edited in CasaXPS.DEF/PrintFootNote.txt)

### Mn3s 13

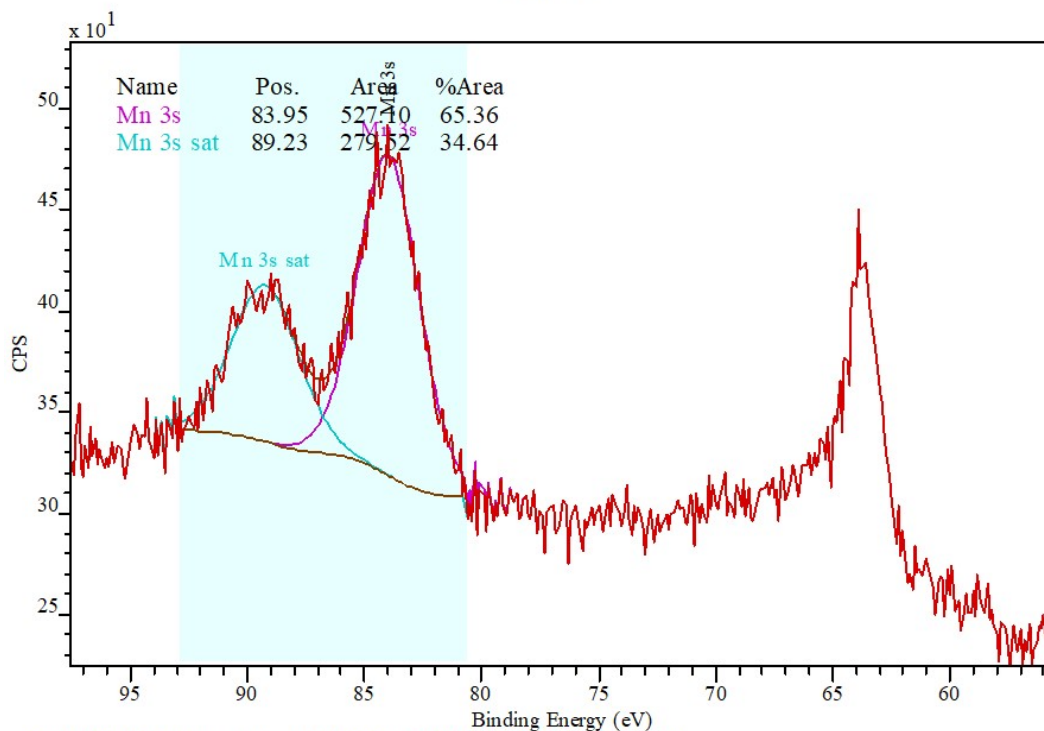

CasaXPS (This string can be edited in CasaXPS.DEF/PrintFootNote.txt)

O1s 3

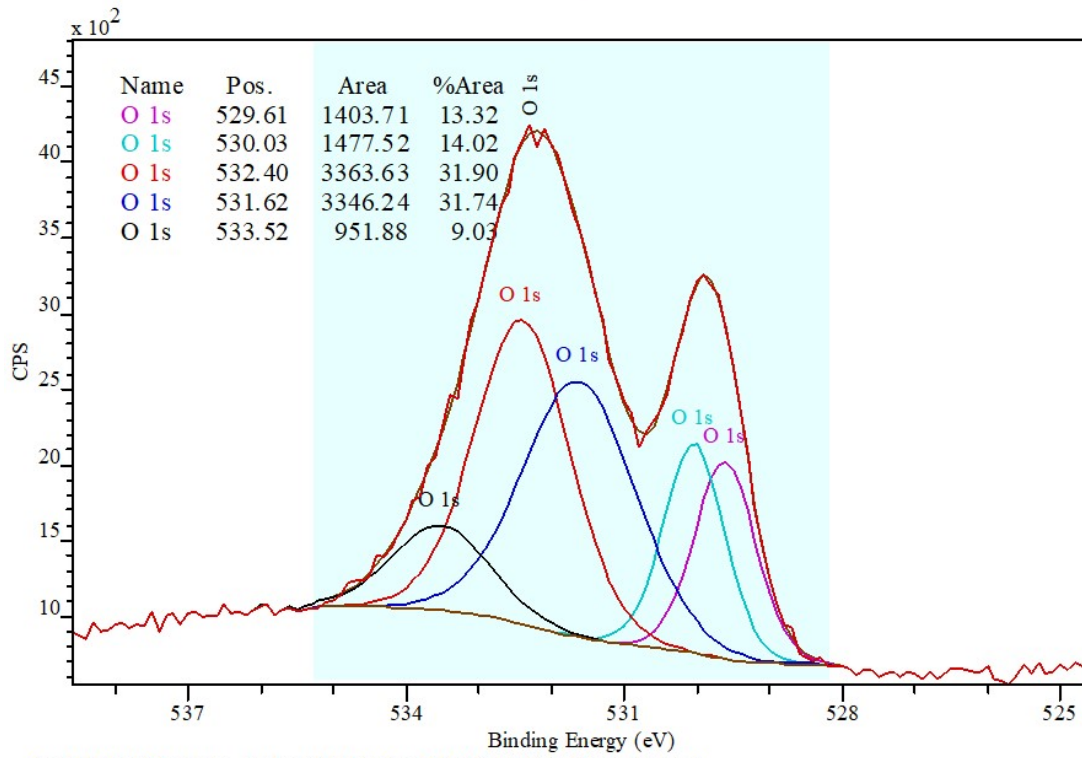

CasaXPS (This string can be edited in CasaXPS.DEF/PrintFootNote.txt)

Sn3d 4

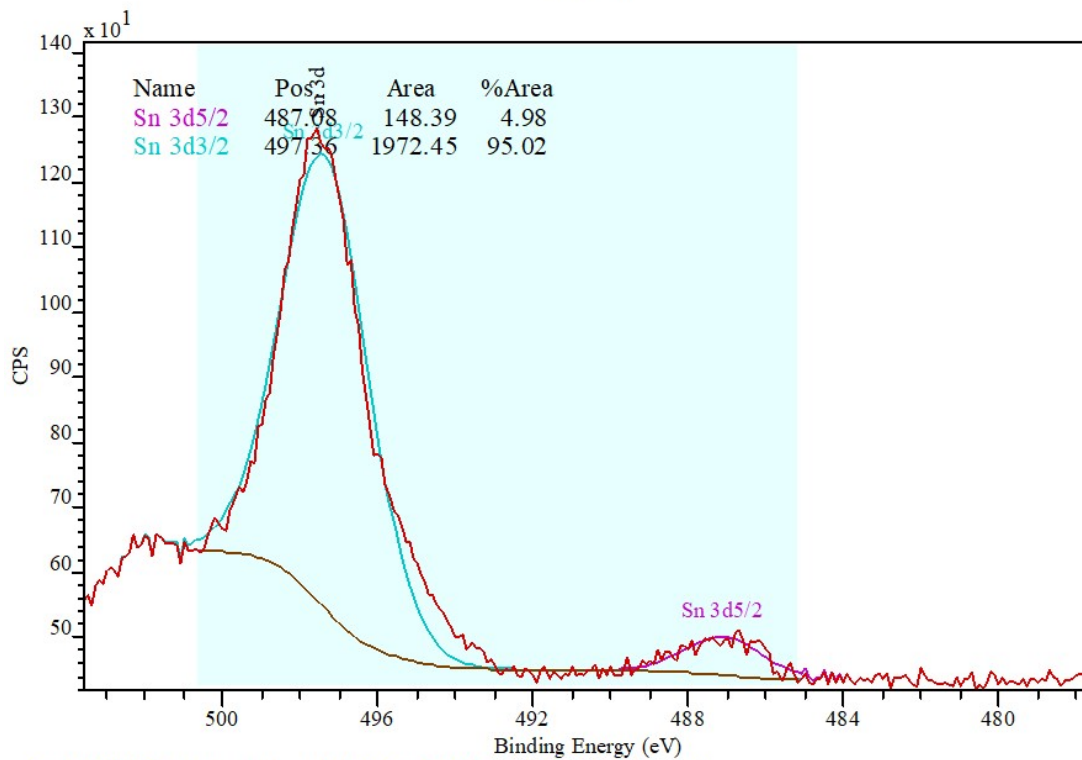

CasaXPS (This string can be edited in CasaXPS.DEF/PrintFootNote.txt)

In3d 5

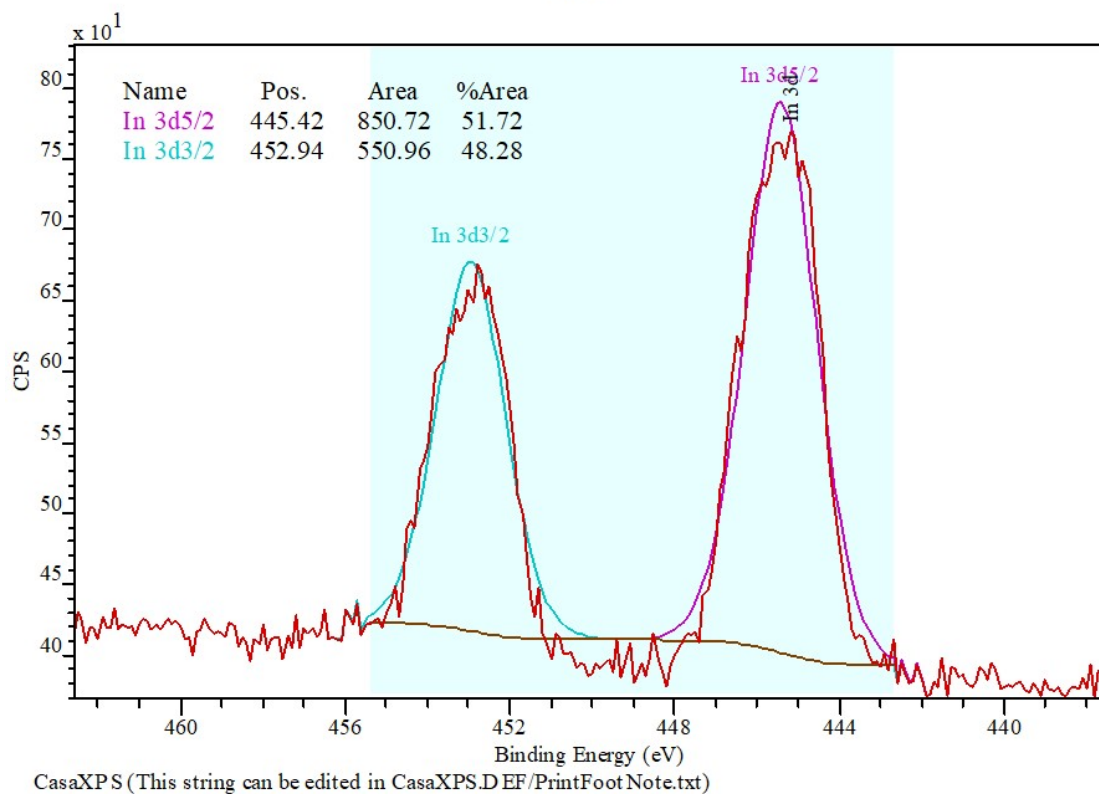

pH3.5\_CV\_60

SUR 1

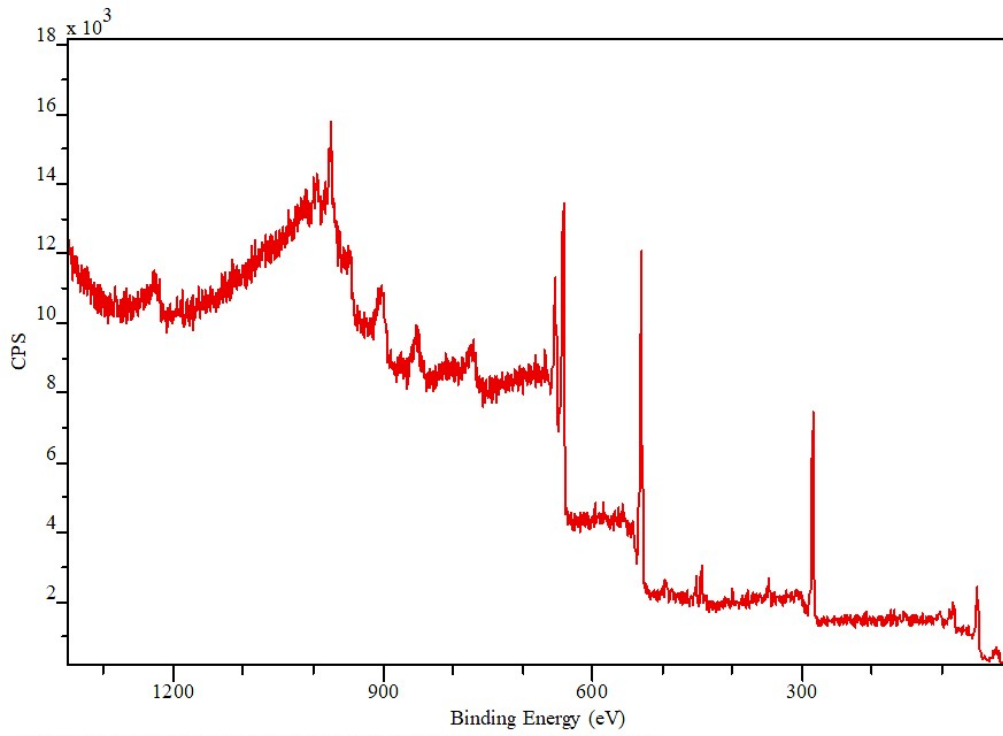

CasaXPS (This string can be edited in CasaXPS.DEF/PrintFootNote.txt)

Mn2p 1

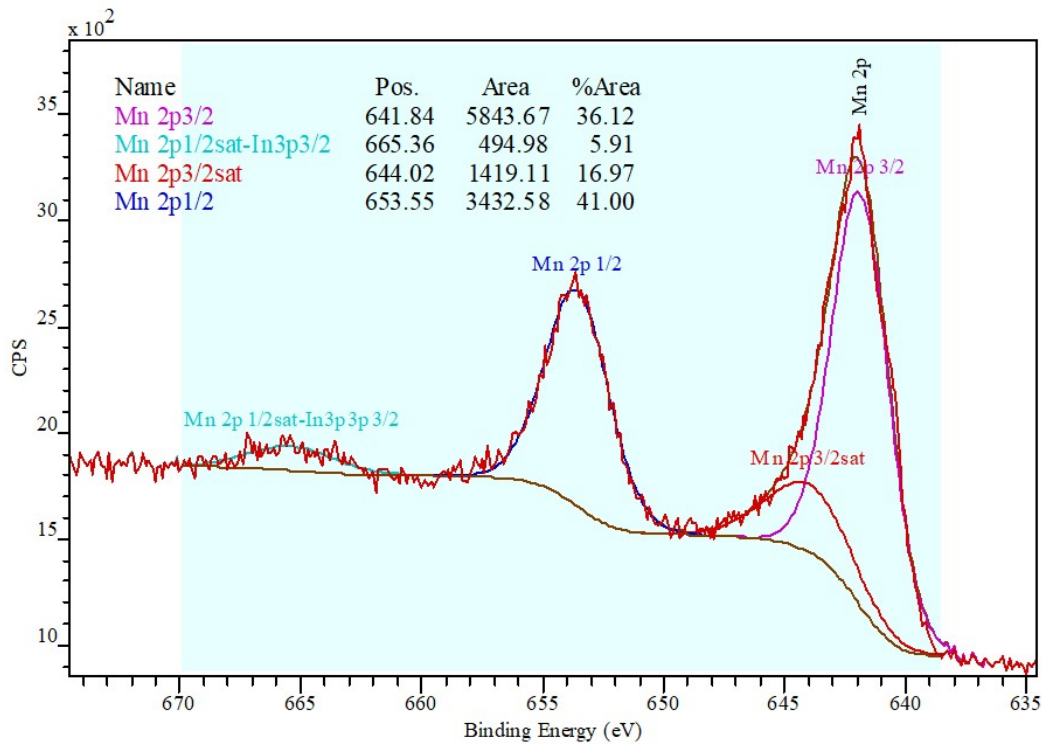

CasaXPS (This string can be edited in CasaXPS.DEF/PrintFootNote.txt)



Mn3s 11

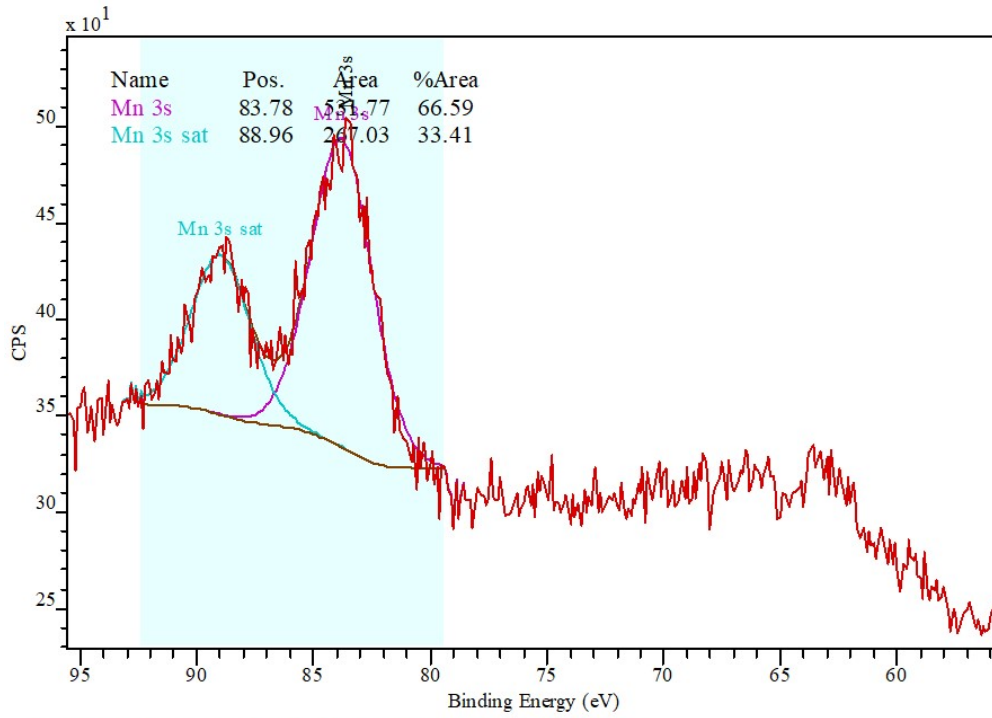

CasaXPS (This string can be edited in CasaXPS.DEF/PrintFootNote.txt)

O1s 2

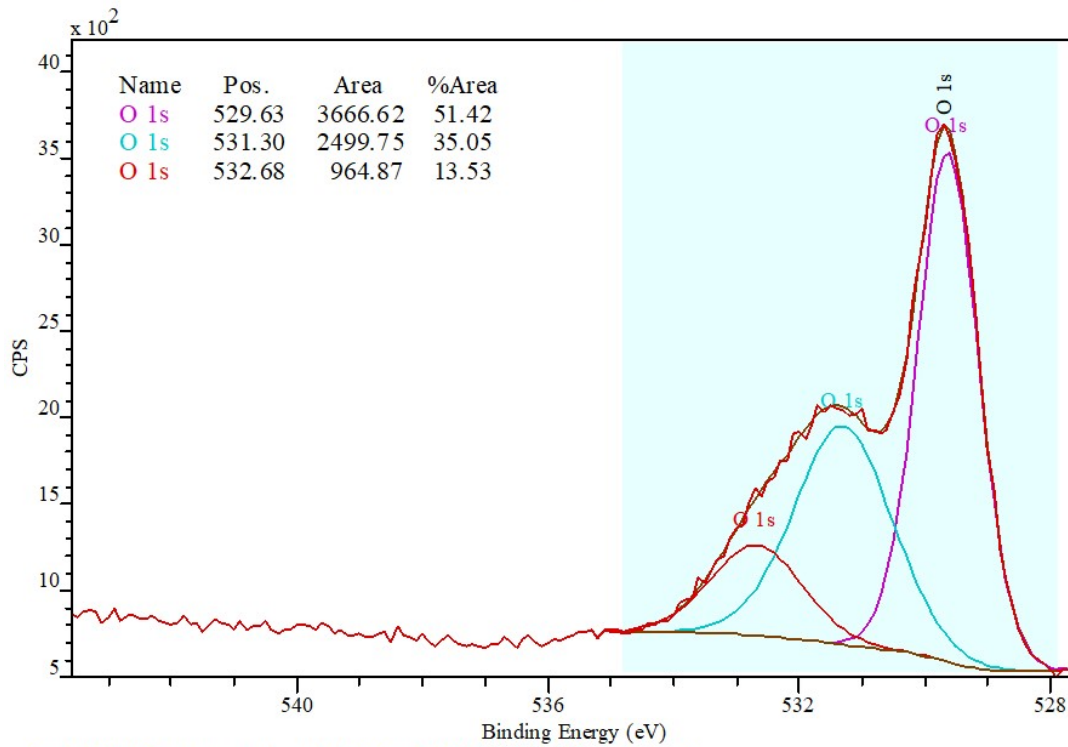

CasaXPS (This string can be edited in CasaXPS.DEF/PrintFootNote.txt)

### Sn3d 3

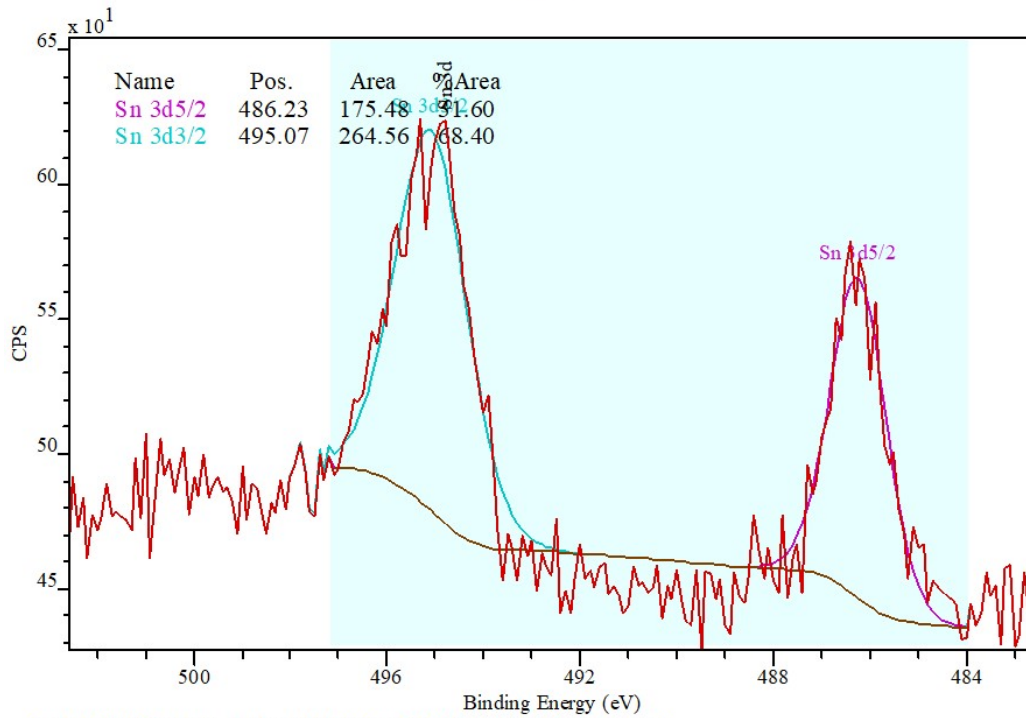

CasaXPS (This string can be edited in CasaXPS.D EF/PrintFoot Note.txt)

### In3d 4

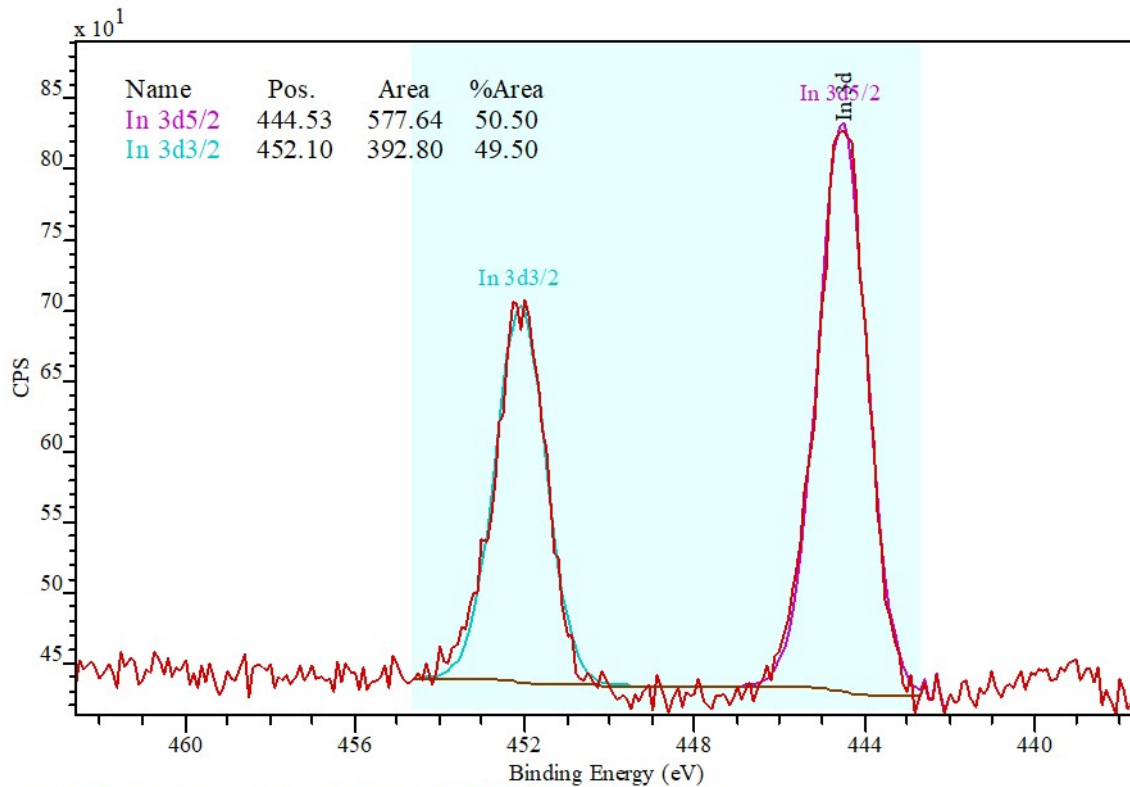

CasaXPS (This string can be edited in CasaXPS.D EF/PrintFoot Note.txt)

# XRD

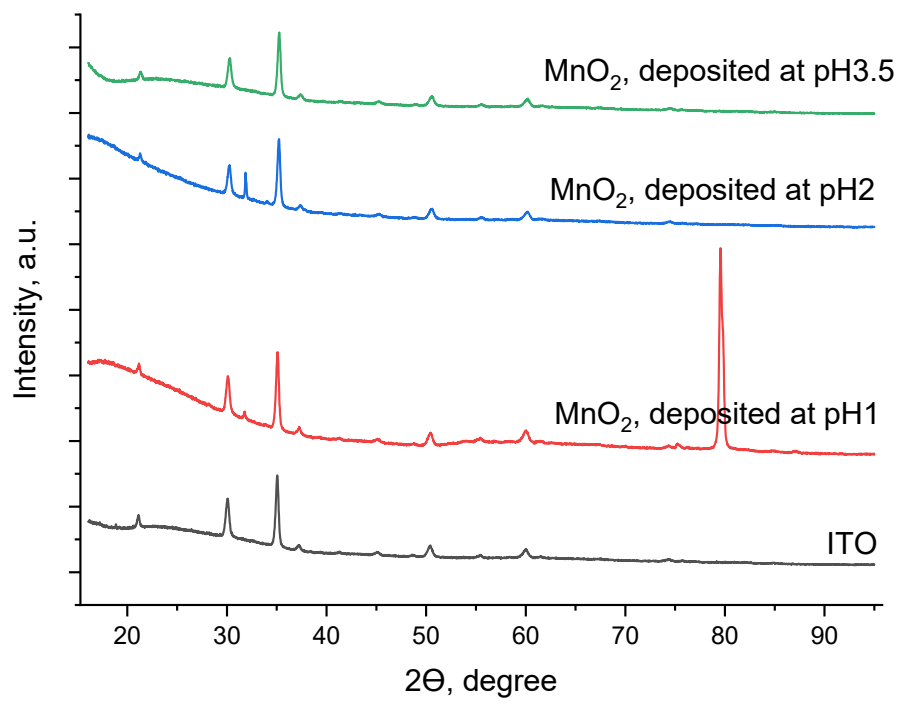

# Additional SEM images

pH1\_CV\_60

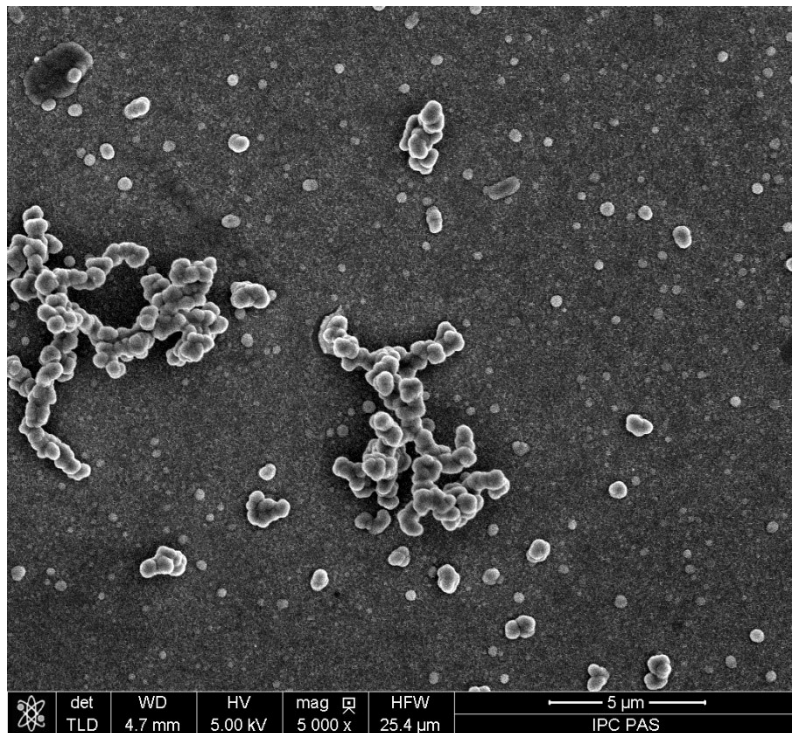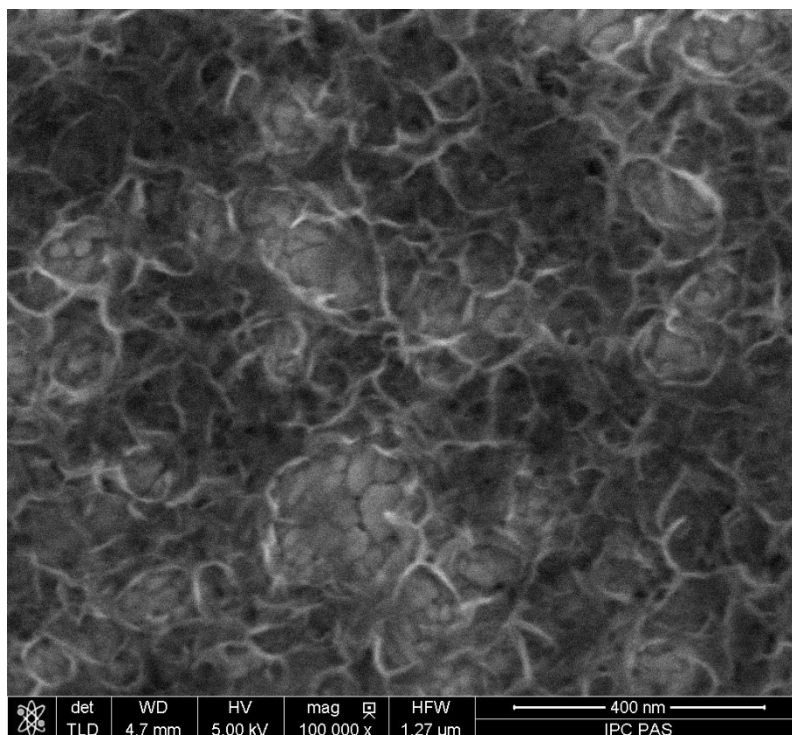

pH1\_CV\_60\_thicker

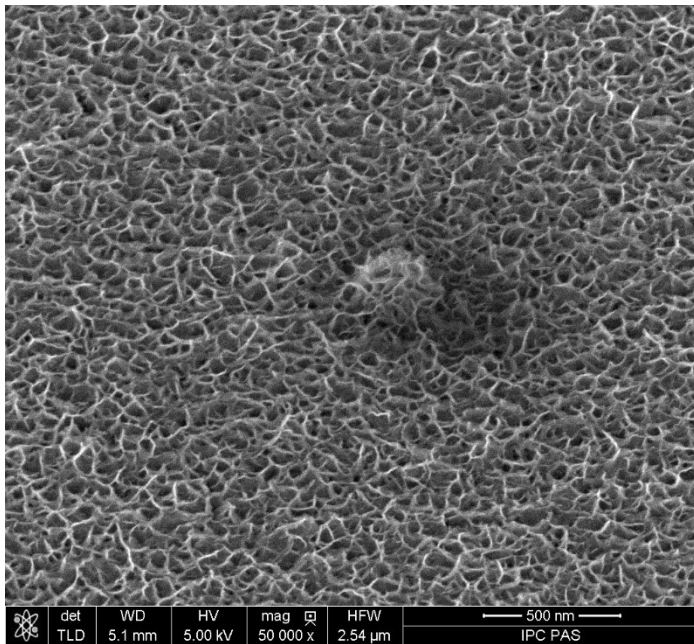

pH1\_CA\_60

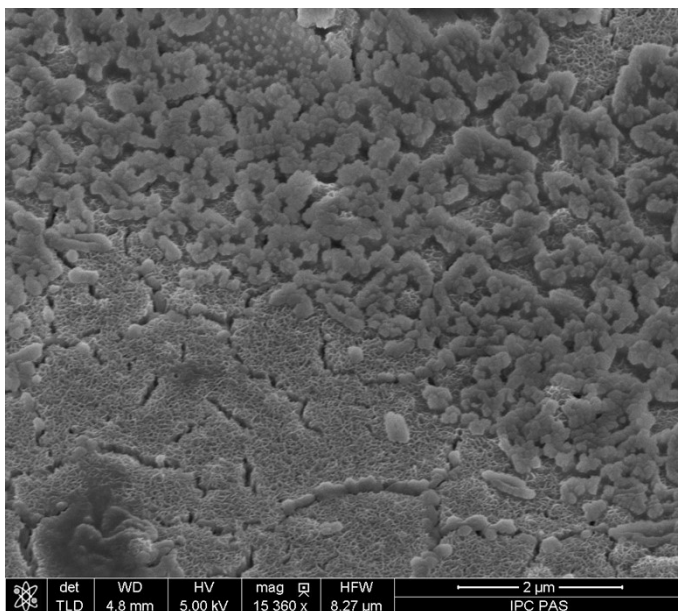

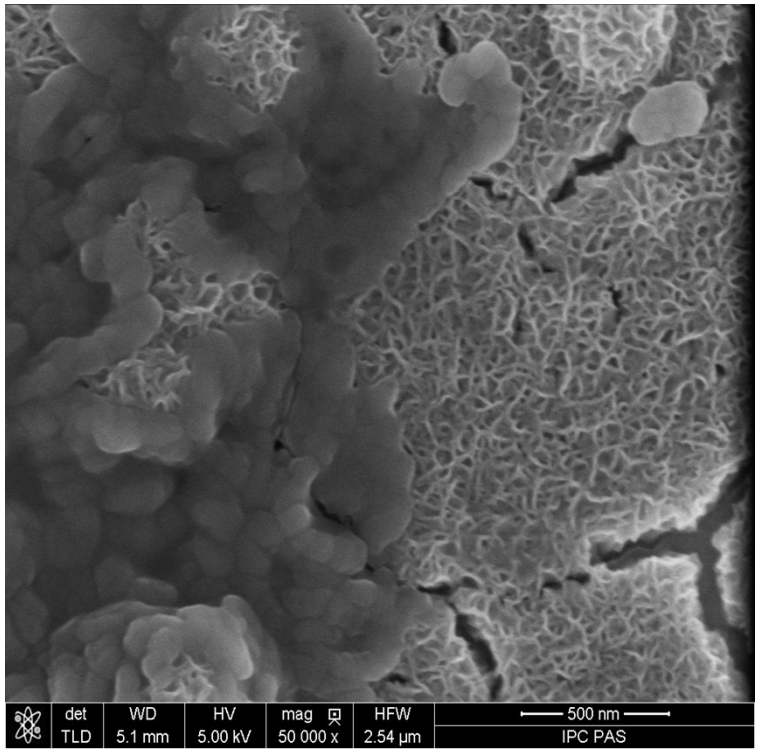

pH3.5\_CV\_90

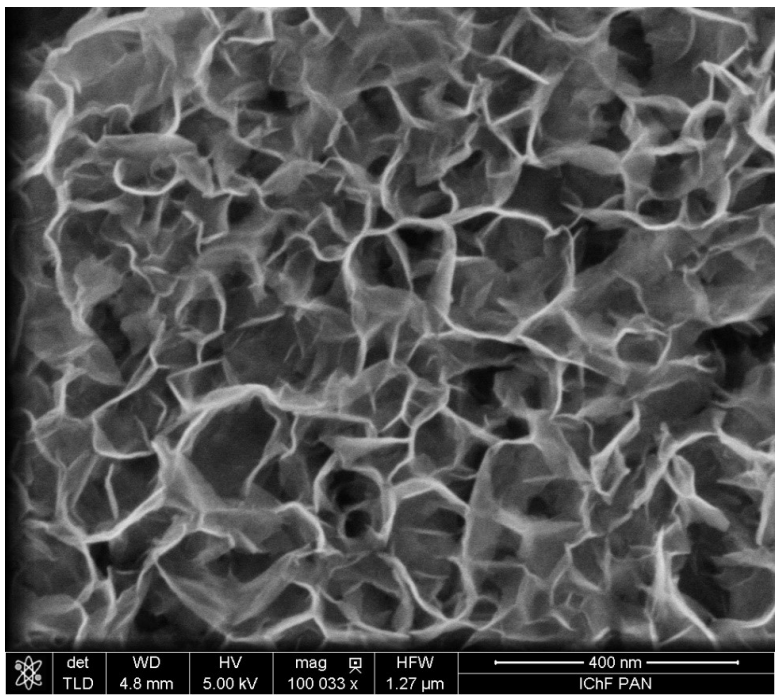

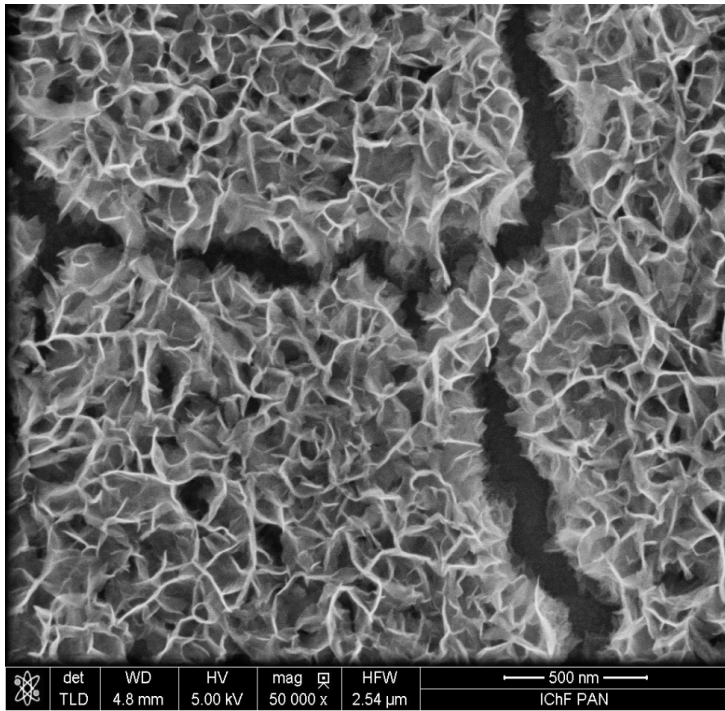

pH3.5\_CA\_90

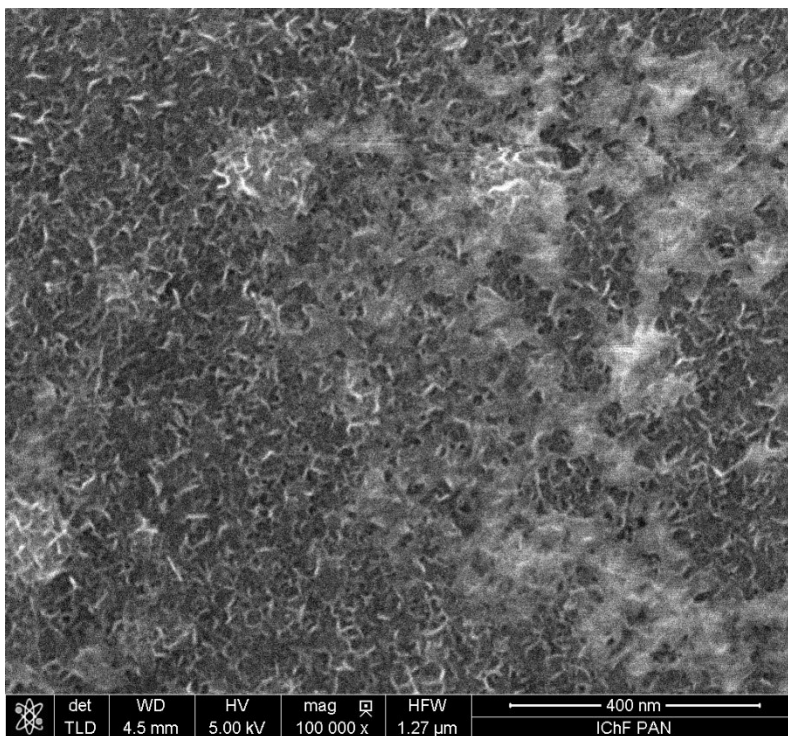

pH3.5\_CV\_60

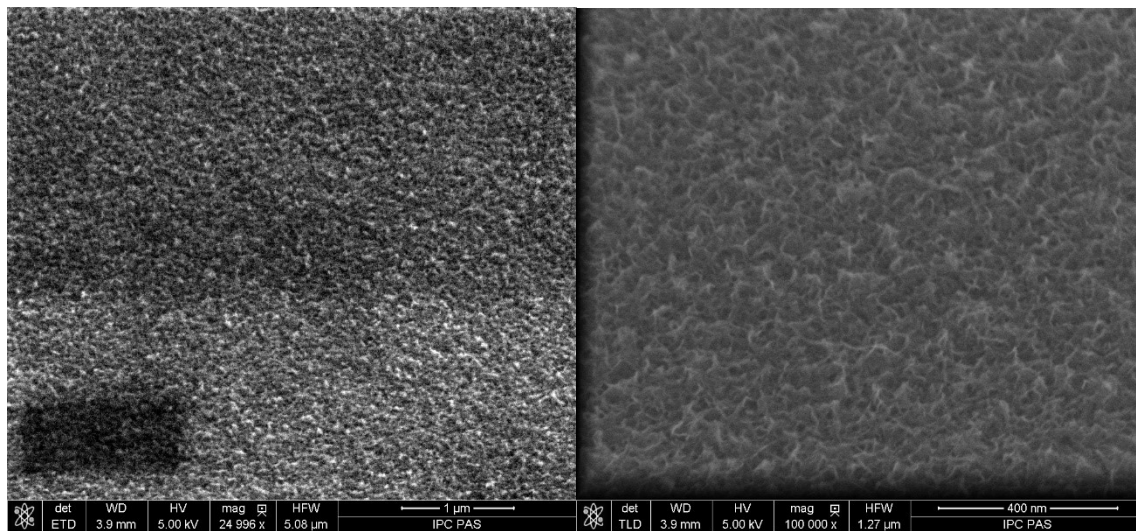

pH2\_CV\_60

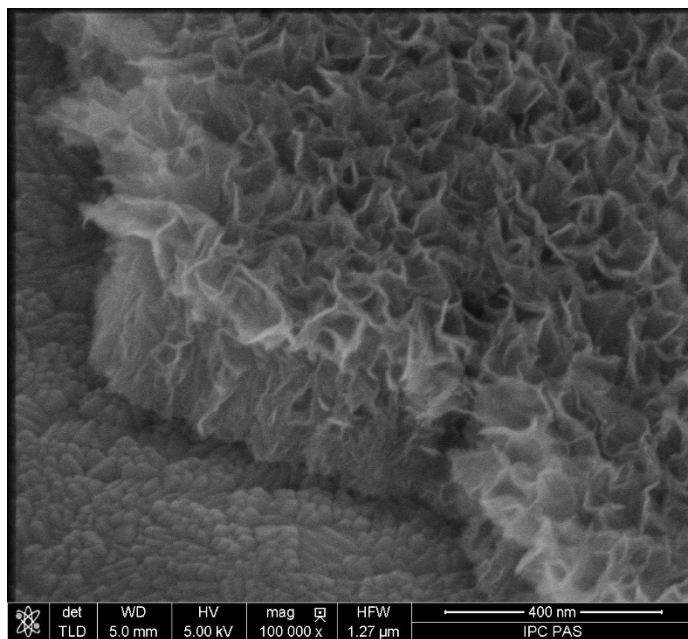



pH1\_CA\_60

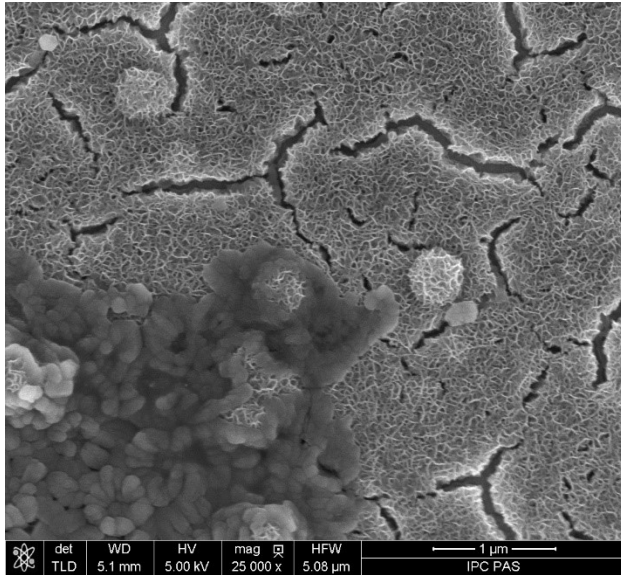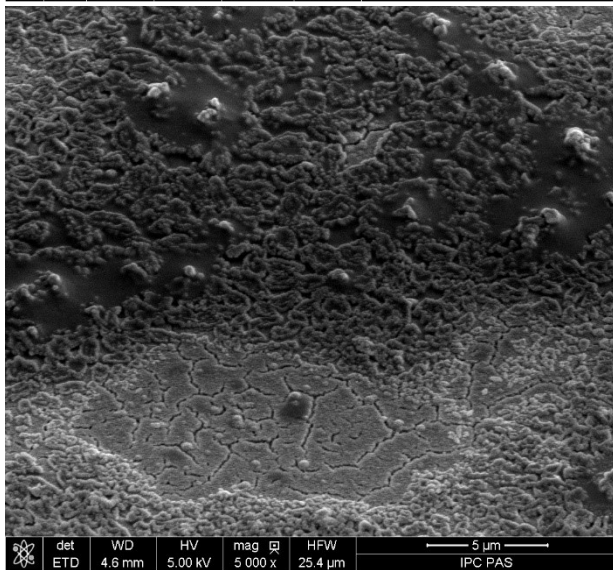

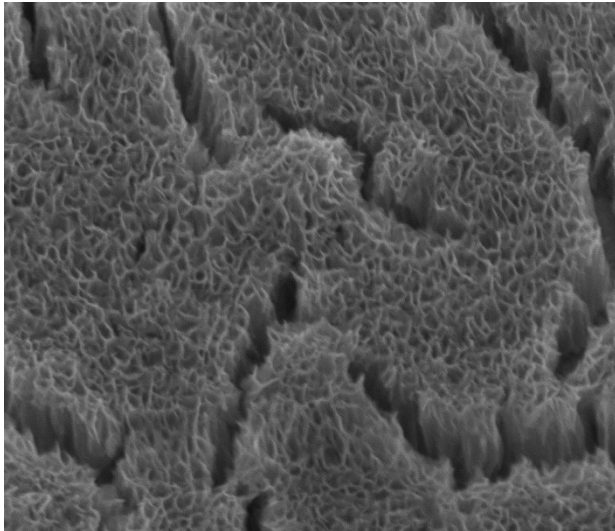

|                                                                                   |     |        |         |          |   |         |         |
|-----------------------------------------------------------------------------------|-----|--------|---------|----------|---|---------|---------|
|  | det | WD     | HV      | mag      | □ | HPW     | 500 nm  |
|                                                                                   | TLD | 4.8 mm | 5.00 kV | 50 000 x |   | 2.54 μm | IPC PAS |
